# Supplementary material for: Electrophoretic assembly of nanozeolites: zeolite coated fibers and hollow zeolite fibers
Source: Royal Society of Chemistry journal article supplement (doi:10.1039/b010197o), 2001-01-01
Supplement: b010197o.doc [file b010197o.doc]

**
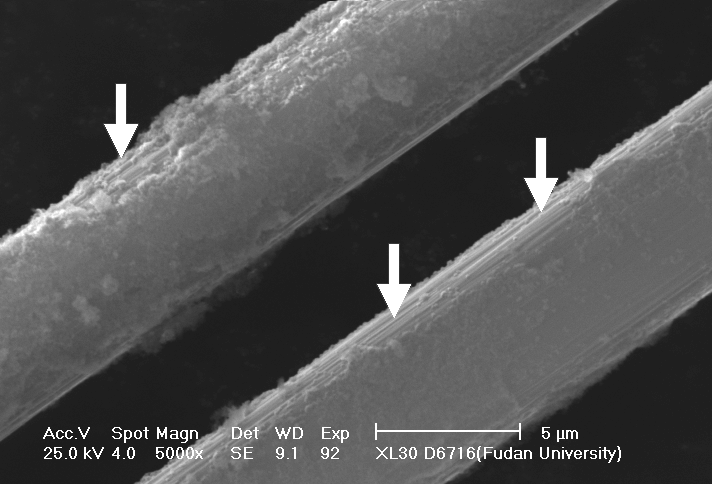
**

Fig. S1 SEM image of zeolite coated fibers prepared under pH 4.5, 2V, 2×10 min. The arrows indicate the existence of the uncoated areas on the zeolite coated fibers prepared under this condition.


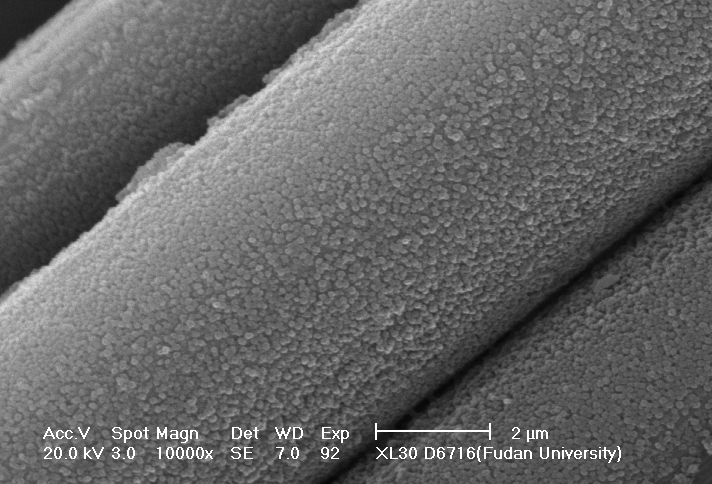


Fig. S2 SEM image of zeolite coated fibers prepared under pH 2.5, 2V, 2×10 min. It displays even and dense zeolite films instead of the original lognitudinal strips on carbon fibers.


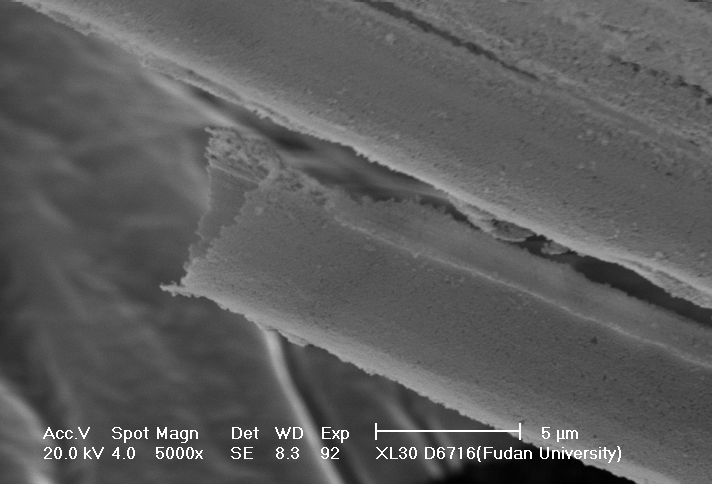


Fig. S3 SEM image of hollow zeolite fibers obtained by calcining the zeolite coated fibers prepared under pH 2.5, 2V, 2×10 min. It illustrates the fibers are hollow while maintaining the fibrous morphology of carbon templates.
