# Supplementary material for: Electrophoretic assembly of nanozeolites: zeolite coated fibers and hollow zeolite fibers
Source: Royal Society of Chemistry journal article supplement (doi:10.1039/b010197o), 2001-01-01
Supplement: b010197o2.doc [file b010197o2.doc]

Fig. S4 XRD spectra of the carbon fiber substrates (a); zeolite coated fibers (b) and hollow zeolite fibers (c).
